# Supplementary material for: Host immunity modulates the efficacy of microbiota transplantation for treatment of Clostridioides difficile infection
Source: PubMed Central journal article supplement (PMC7854624; doi:10.1038/s41467-020-20793-x), 2021-02-02
Supplement: 41467_2020_20793_MOESM1_ESM.pdf [file 41467_2020_20793_MOESM1_ESM.pdf]

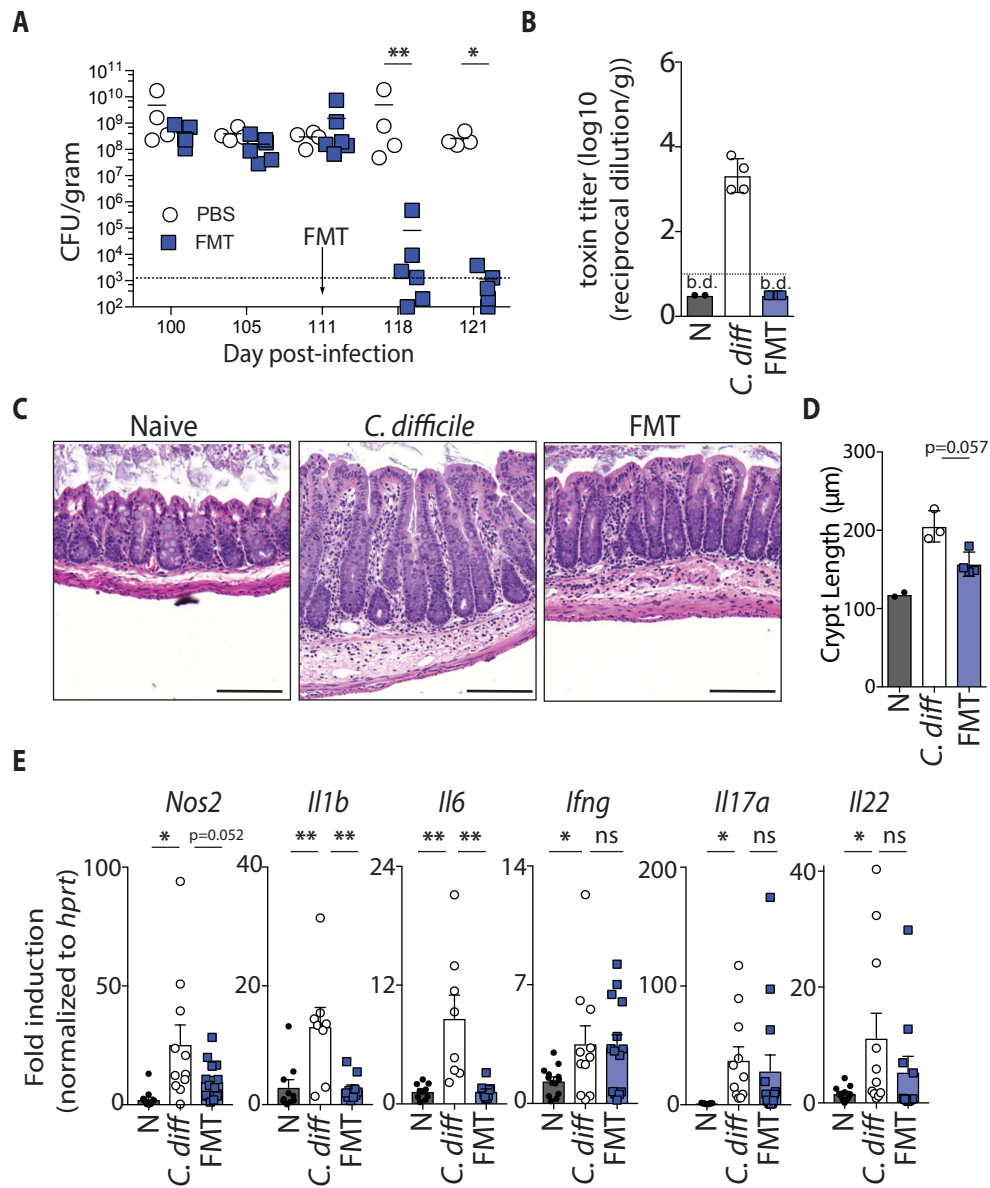

**Supplementary Figure 1. Fecal Microbiota Transplantation (FMT) resolves *C. difficile* infection and ameliorates chronic intestinal inflammation.** (A) *C. difficile* burden in fecal pellets of C57BL/6 mice following FMT (n=6) or PBS (n=4) treatment. Statistical significance was calculated by a two-sided unpaired Mann-Whitney test; \*p=0.016, \*\*p=0.0095. (B-E) Mice were sacrificed at day 10 post-FMT or PBS treatment and compared to naïve, C57BL/6 mice. (B) Toxin B levels in the cecal content. Data are presented as mean values ± SEM. (C) H&E stained cecal tissue sections. Scale bar = 100 µm. Images representative of two independent experiments. (D) Mean crypt length. n=2 Naïve; n=3 *C. diff*; n=4 FMT groups. Data is representative of 2 independent experiments. Statistical significance was calculated by a two-sided unpaired Mann-Whitney test. Data are presented as mean values ± SEM. (E) mRNA gene expression of proinflammatory immune response genes in whole colon tissue quantified by qRT-PCR. Gene expression relative to naïve, C57BL/6 mice and normalized to *Hprt*. For *Nos2*, *Ifng*, *Il17a*, and *Il22* genes n=13 naïve; n=11 PBS; n=14 FMT mice examined over four independent experiments. For *Il6* and *Il1b* genes n=10 naïve; n=8 PBS; n=10 FMT mice examined over three independent experiments. Statistical significance was calculated by a two-sided unpaired t-test. \*p<0.05, \*\*p<0.01. Data are presented as mean values ± SEM. b.d. – below detection.

## Supplementary Figure 2

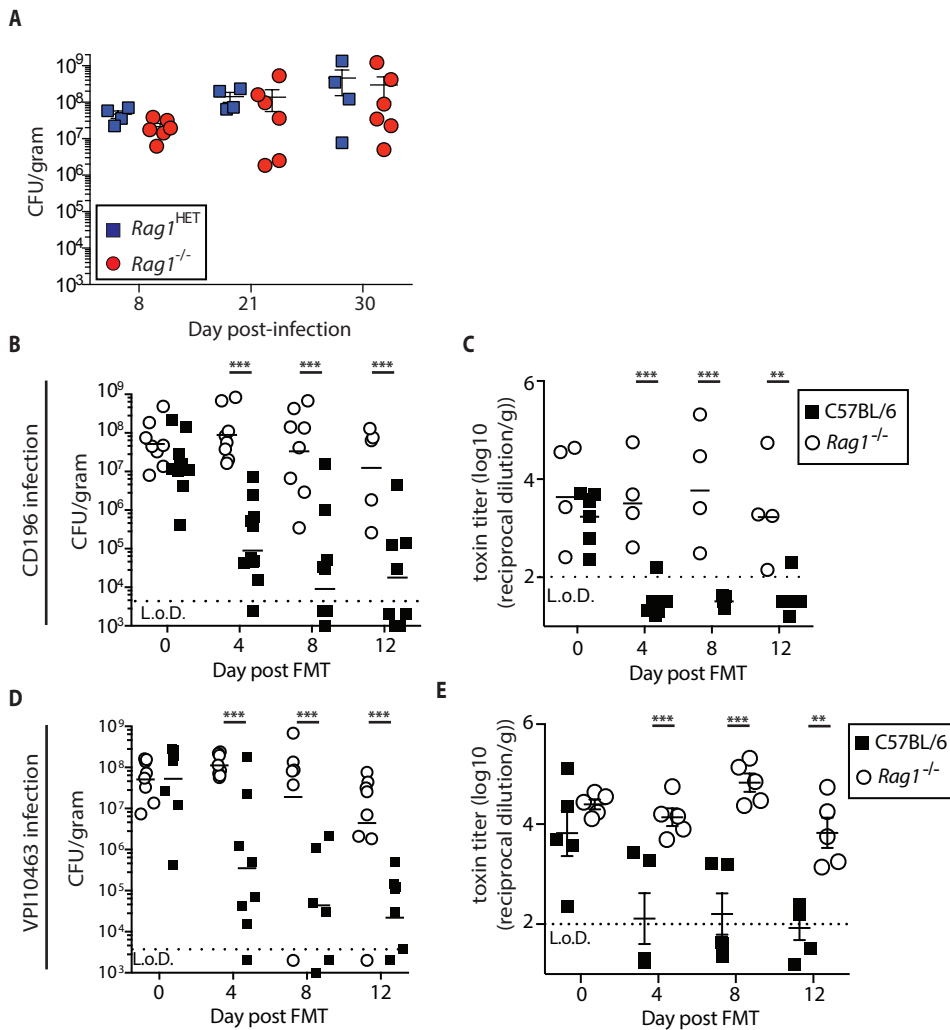

**Supplementary Figure 2. Immunodeficient *Rag1*<sup>-/-</sup> mice exhibit impaired resolution of *C. difficile* infection compared to cohoused C57BL/6 mice.** (A) Fecal *C. difficile* burden following infection in littermate antibiotic-treated *Rag1*<sup>HET</sup> (n=4) and *Rag1*<sup>-/-</sup> mice (n=6). Data are representative of five independent experiments and are presented as mean values ± SEM. (B-E) Cohoused *Rag1*<sup>-/-</sup> and C57BL/6 mice were antibiotic-treated and infected with *C. difficile* (B-C) CD196 strain or (D-E) VPI10463 strain. (B) *C. difficile* bacterial burden and (C) toxin titers in fecal pellets in CD196 infected *Rag1*<sup>-/-</sup> and C57BL/6 mice following FMT administration. (D) *C. difficile* bacterial burden and (E) toxin titers in fecal pellets in VPI10463 infected *Rag1*<sup>-/-</sup> and C57BL/6 mice following FMT administration. For data in B, n=8 *Rag1*<sup>-/-</sup>; n=10 C57BL/6 mice examined over three independent experiments. Statistical significance was calculated by a two-way ANOVA. \*\*\*p<0.0001 For data in C, n=4 *Rag1*<sup>-/-</sup>; n=6 C57BL/6 mice. Statistical significance was calculated by two-way ANOVA. \*\*\*p<0.0001, \*\*p=0.007. For data in D, n=8 *Rag1*<sup>-/-</sup> and C57BL/6 mice examined over two independent experiments. Statistical significance was calculated by two-way ANOVA. \*\*\*p<0.001. For data in E, n=5 *Rag1*<sup>-/-</sup> and C57BL/6 mice. Statistical significance was calculated by two-way ANOVA. \*\*\*p<0.0005, \*\*p=0.001. Data are presented as mean values ± SEM.

# Supplementary Figure 3

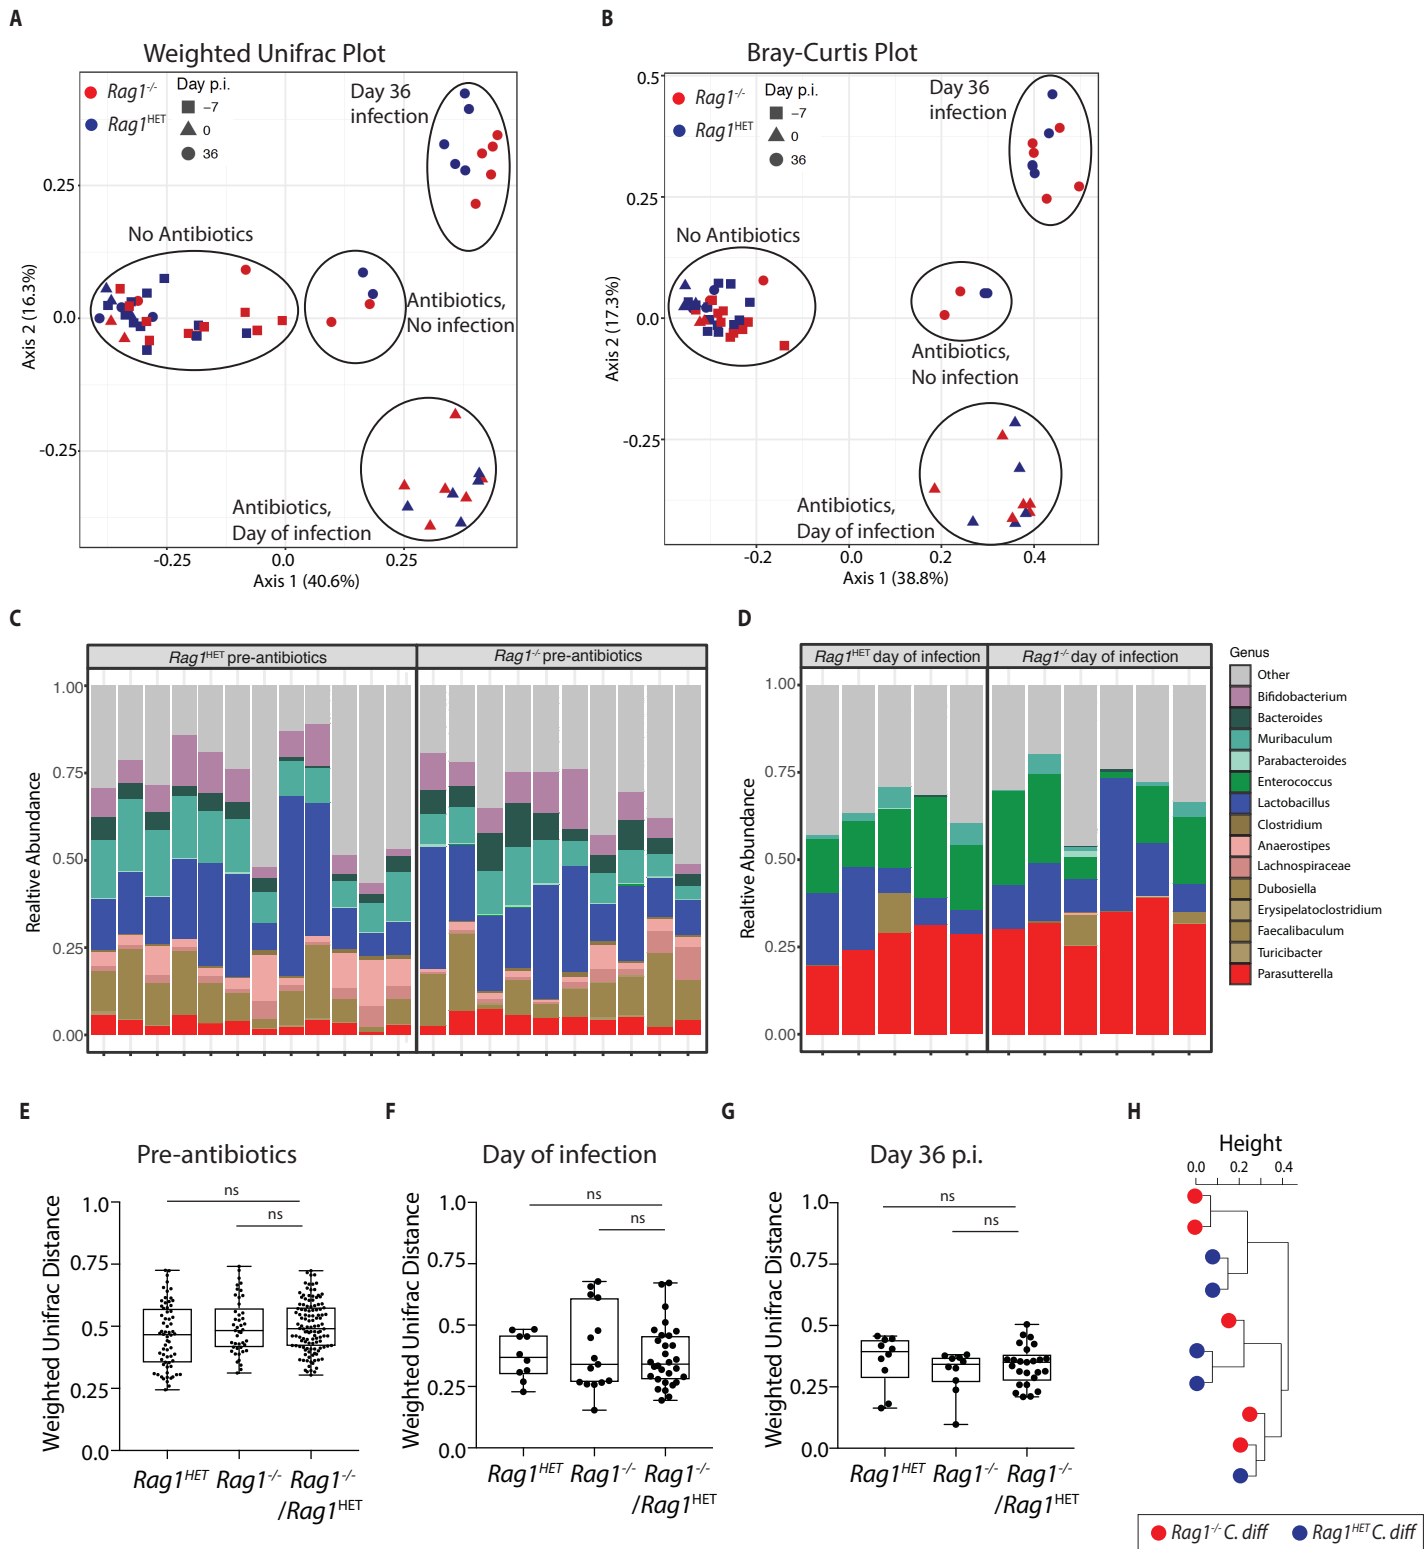

**Supplementary Figure 3 Microbiota comparisons of Rag<sup>HET</sup> and Rag<sup>-/-</sup> mice.** (A) Weighted UniFrac and (B) Bray-Curtis principal coordinate analysis plot of 16S bacterial rRNA ASVs from fecal pellets of Rag<sup>-/-</sup> and Rag<sup>HET</sup> mice prior to ABX treatment (n=10 Rag<sup>-/-</sup>; n=12 Rag<sup>HET</sup> mice), day 0 of infection (n=6 Rag<sup>-/-</sup>; n=5 Rag<sup>HET</sup> mice), or day 36 post-*C. difficile* (n=5 Rag<sup>-/-</sup> and Rag<sup>HET</sup> mice) or mock infection (n=2). Ellipses signify different experimental groups. (C-D) Relative abundance of top 15 bacterial ASVs in the microbiota of Rag<sup>-/-</sup> and Rag<sup>HET</sup> mice (C) prior to antibiotic treatment (D) and at day 0 of infection. (E-G) Weighted UniFrac distance comparing the microbiota beta diversity dissimilarity within and between Rag<sup>HET</sup> and Rag<sup>-/-</sup> mice (E) prior to antibiotics (n=10 Rag<sup>-/-</sup>; n=12 Rag<sup>HET</sup> mice), (F) at day 0 of infection (n=6 Rag<sup>-/-</sup>; n=5 Rag<sup>HET</sup> mice), and (G) at day 36 p.i. (n=5 Rag<sup>-/-</sup> and Rag<sup>HET</sup> mice). One-way ANOVA conducted for statistical comparison using Dunnett method for multiple comparison adjustments. Boxes represent median, first and third quartile. Whiskers extend to the highest and lowest data point. (H) Dendrogram representation of intestinal microbial communities of *C. difficile*-infected of Rag<sup>-/-</sup> and Rag<sup>HET</sup> mice using unsupervised hierarchical clustering of weighted UniFrac distances to identify similarities between samples.

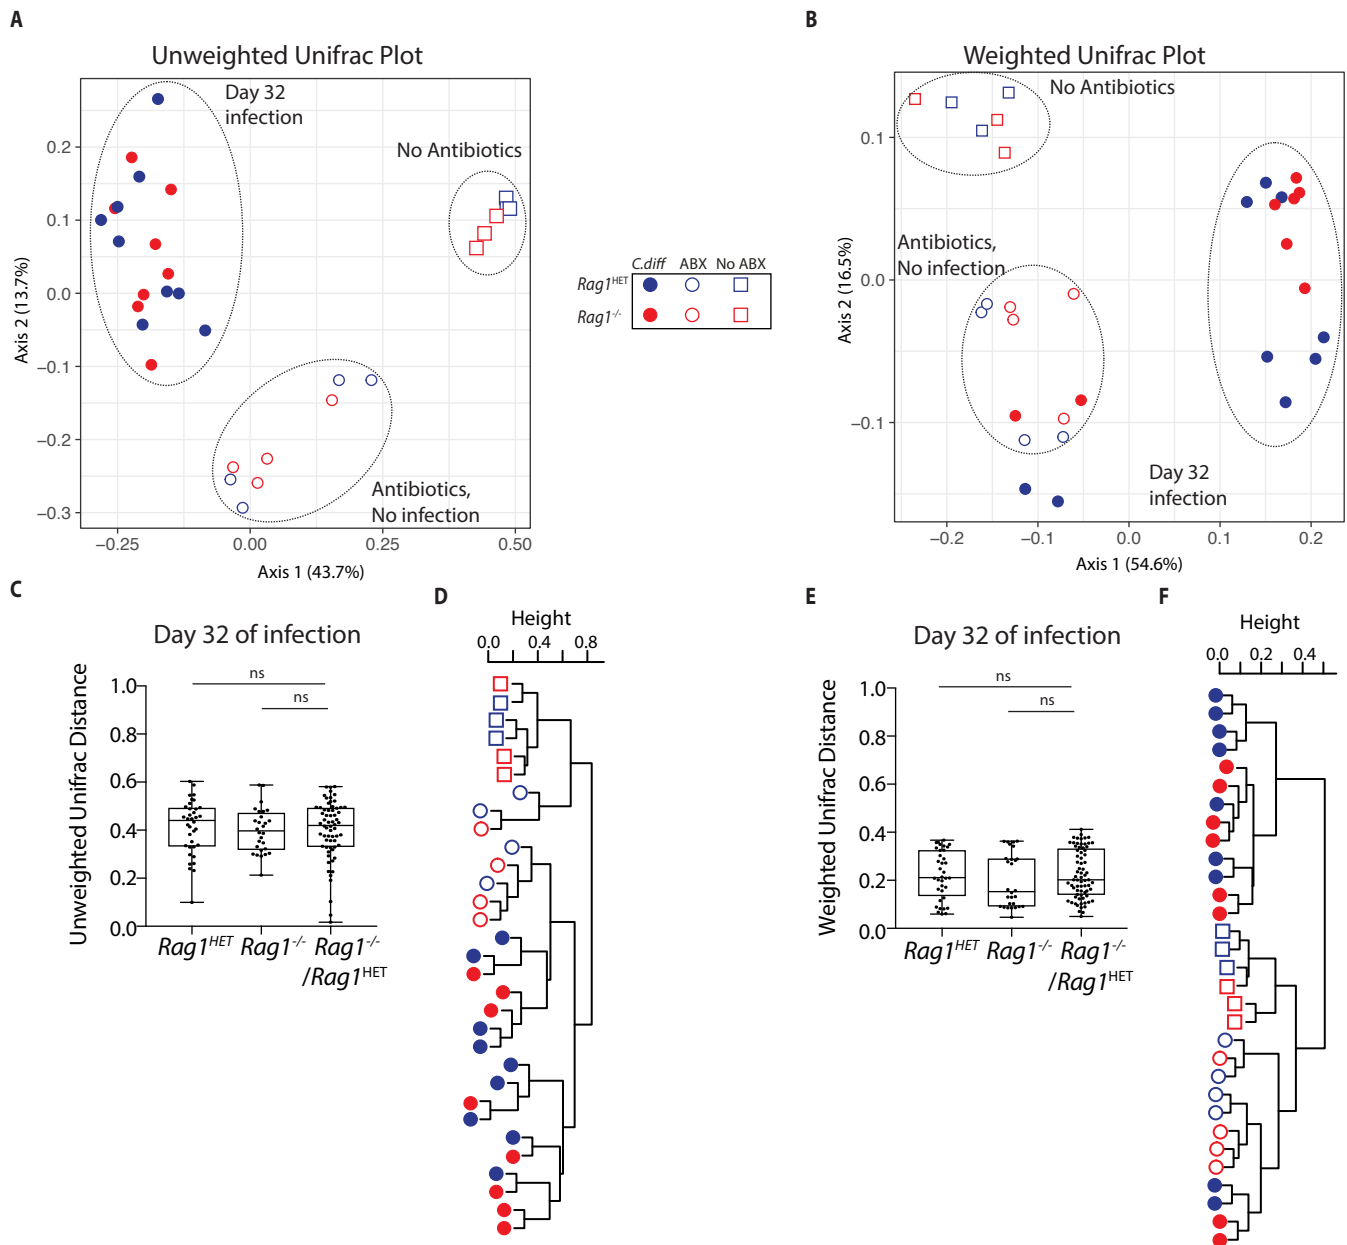

**Supplementary Figure 4 Microbiota comparisons of Rag1<sup>HET</sup> and Rag1<sup>-/-</sup> mice at time of FMT in validation cohort.** (A) Unweighted and (B) weighted UniFrac principal coordinate analysis plot of 16S bacterial rRNA ASVs from fecal pellets of Rag1<sup>-/-</sup> and Rag1<sup>HET</sup> mice at day 32 post *C. difficile* infection (day of FMT, Rag1<sup>HET</sup>, n= 9; Rag1<sup>-/-</sup>, n=8 mice), day 32 post antibiotic treatment alone (n=4) and day 32 no antibiotic treatment (n=3). Ellipses signify different experimental groups. (C) Unweighted and (E) weighted UniFrac distance comparing the microbiota beta diversity dissimilarity within and between Rag1<sup>HET</sup> (n= 9) and Rag1<sup>-/-</sup> (n=8) mice at day 32 post *C. difficile* infection. One-way ANOVA conducted for statistical comparison using Dunnett method for multiple comparison adjustments. Boxes represent median, first and third quartile. Whiskers extend to the highest and lowest data point. (D,F) Dendro-gram representation of intestinal microbial communities of *C. difficile*-infected of Rag1<sup>-/-</sup> and Rag1<sup>HET</sup> mice using unsupervised hierarchical clustering of (D) unweighted and (F) weighted UniFrac distances to identify similarities between samples.

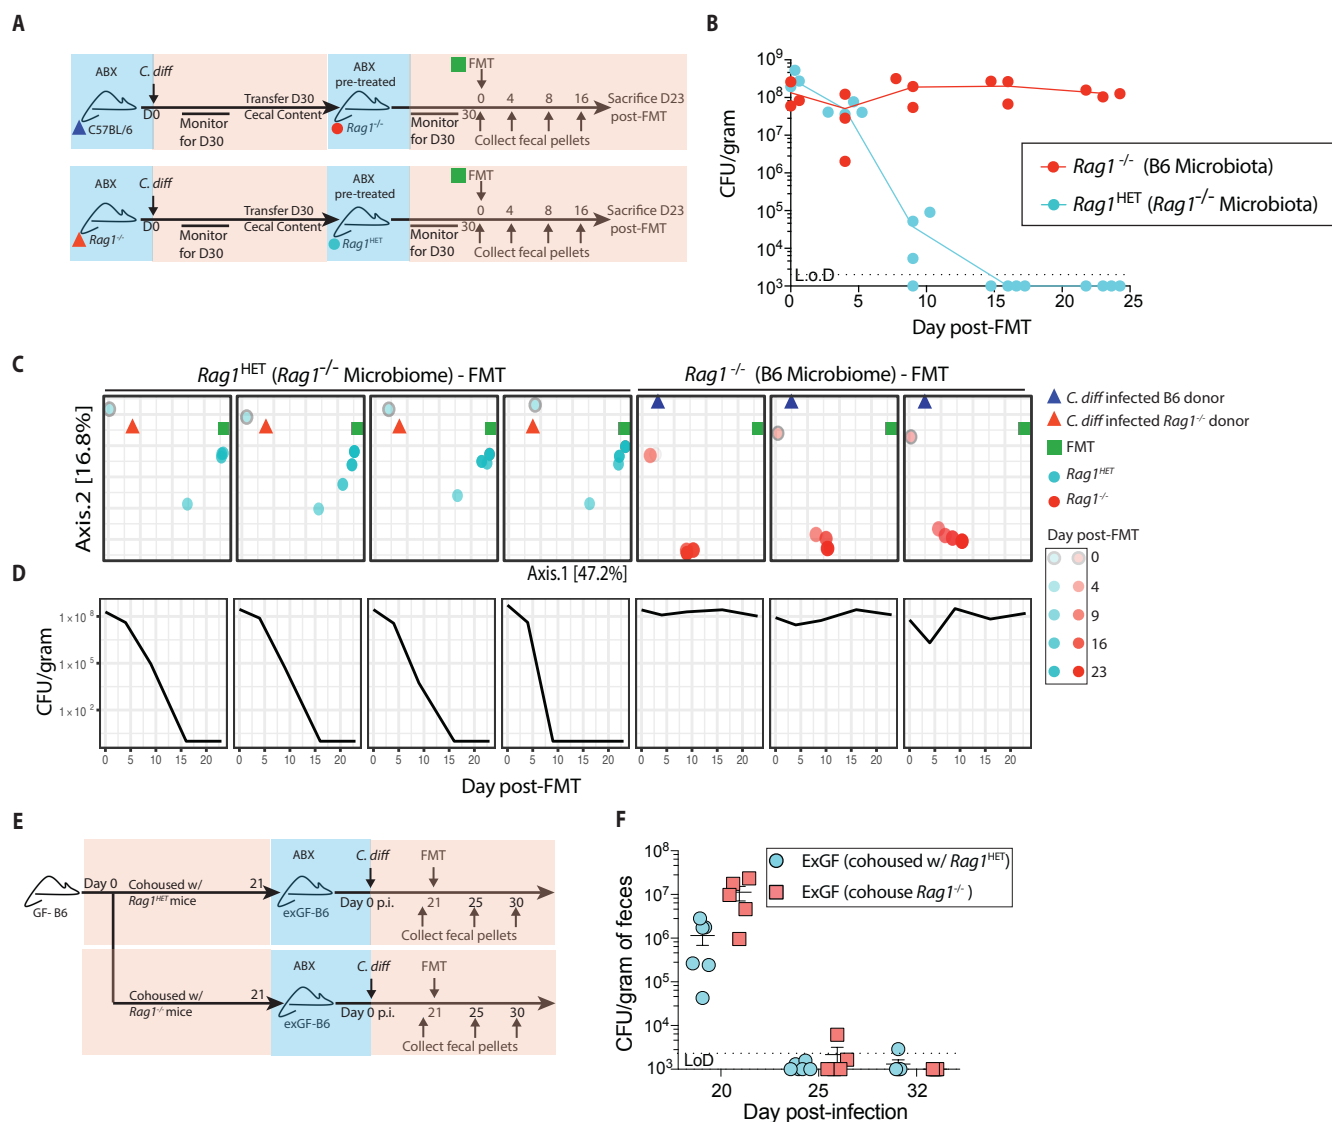

**Supplementary Figure 5. *Rag1*<sup>-/-</sup> mice transplanted with a microbiota derived from *C. difficile*-infected C57BL/6 mice fail to resolve *C. difficile* following FMT.** (A) Experimental schematic. Antibiotic-treated C57BL/6 and *Rag1*<sup>-/-</sup> were infected with *C. difficile*. At day 30 p.i. cecal content containing *C. difficile* was transferred into reciprocal antibiotic-treated *Rag1*<sup>-/-</sup> (n=3) or littermate *Rag1*<sup>HET</sup> mice (n=4). At day 21 post cecal transplant, mice were administered FMT and (B) *C. difficile* burden monitored in the fecal pellets. (C) UniFrac principal coordinate analysis of 16S bacterial rRNA sequence reads from the fecal pellets of mice post FMT. Each PCoA plot represents a timecourse of an individual mouse. Green squares represent FMT source. Red or blue triangles represent the original microbiota donor. (D) Corresponding plots of *C. difficile* burden in each individual mouse following FMT. Data is representative of two independent experiments. (E) Experimental schematic. Germ-free (GF) C57BL/6 mice were cohoused with either *Rag1*<sup>-/-</sup> or littermate *Rag1*<sup>HET</sup> mice and subsequently treated with antibiotics, infected with *C. difficile* and administered a FMT. (F) *C. difficile* burden in the fecal pellets of Ex-GF mice cohoused with *Rag1*<sup>-/-</sup> mice (n=5) and Ex-GF mice cohoused with *Rag1*<sup>HET</sup> mice (n=6) following FMT. Data are presented as mean values  $\pm$  SEM.

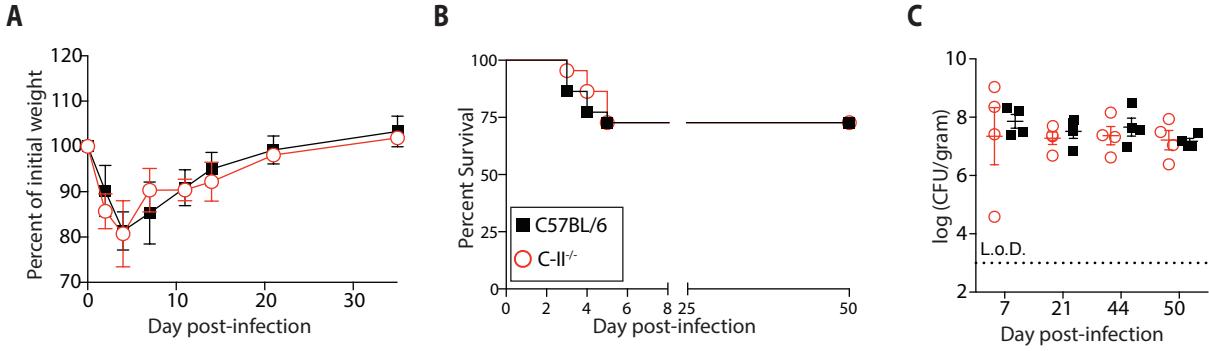

**Supplementary Figure 6. CD4<sup>+</sup> T cell deficient mice exhibit comparable acute morbidity to C57BL/6 mice and establish persistent *C. difficile* infection.** (A) Weight loss, (B) survival, and (C) fecal *C. difficile* burden following infection in cohoused, antibiotic-treated C57BL/6 and C-Il<sup>-/-</sup> mice. Data in A and C is representative of three independent experiments. n = 4. Data are presented as mean values ± SEM. Data in B is a combination of three independent experiments. (C57BL/6 n=11) and (C-Il<sup>-/-</sup> mice n=14).

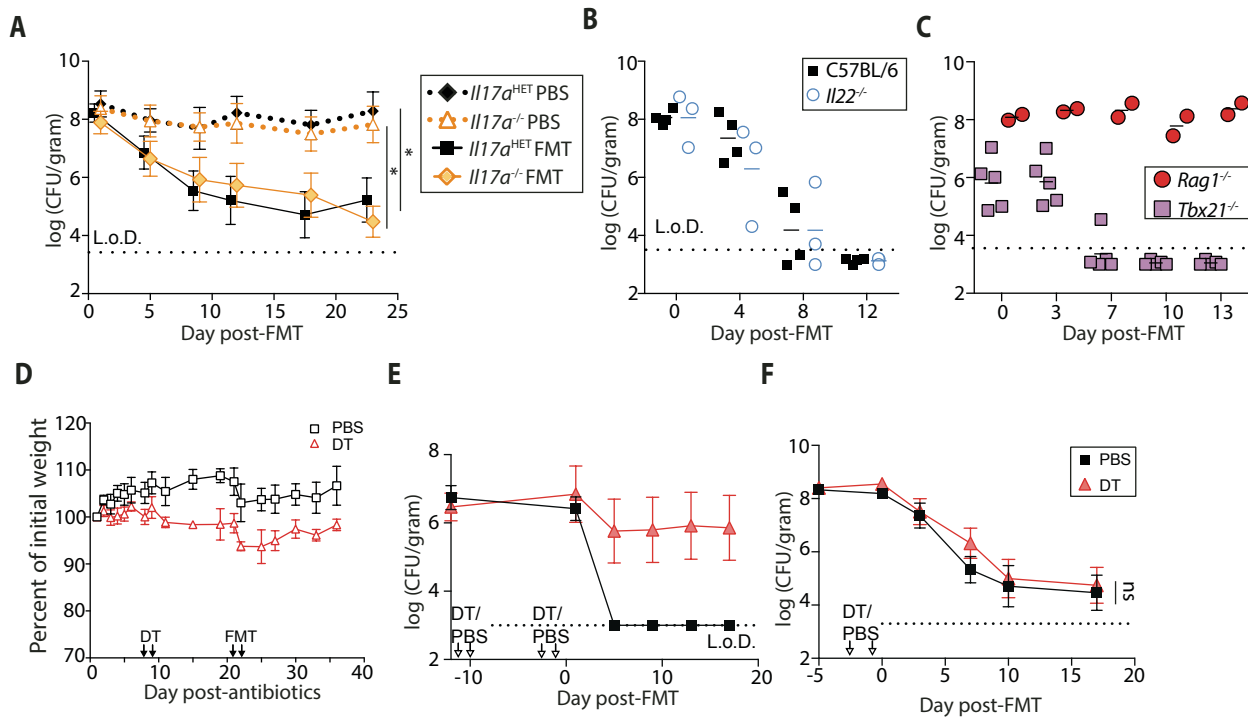

**Supplementary Figure 7. TH17 and TH1 cytokines are dispensable for FMT-mediated resolution of *C. difficile* infection.** (A) Littermate *Il17a*<sup>HET</sup> and *Il17a*<sup>-/-</sup> mice were treated with antibiotics, infected with *C. difficile* and administered FMT or PBS at day +30 post-infection. Fecal *C. difficile* burden following FMT or PBS administration. FMT *Il17a*<sup>HET</sup> (n=6), PBS *Il17a*<sup>HET</sup> (n=3), FMT *Il17a*<sup>-/-</sup> (n=5) PBS *Il17a*<sup>-/-</sup> (n=3). Data is representative of two independent experiments. Statistical significance was calculated by a two-tailed unpaired t-test. (FMT *Il17a*<sup>HET</sup> vs. PBS *Il17a*<sup>HET</sup> \*p=0.022; FMT *Il17a*<sup>-/-</sup> vs. PBS *Il17a*<sup>-/-</sup> \*p=0.011). Data are presented as mean values ± SEM. (B) Cohoused C57BL/6 (n=4) and *Il22*<sup>-/-</sup> (n=3) mice were treated with antibiotics, infected with *C. difficile* and administered FMT at day +30 post-infection. Fecal *C. difficile* burden following FMT. (C) Cohoused *Tbx21*<sup>-/-</sup> (n=4) and *Rag1*<sup>-/-</sup> (n=2) mice were treated with antibiotics, infected with *C. difficile* and administered FMT at day +30 post-infection and fecal *C. difficile* burden was assessed following FMT. (D) Weight loss of ABX-treated, uninfected *Foxp3DTR* mice following DT or PBS administration. n = 3 mice. Data is representative of three independent experiments. (E,F) *Foxp3DTR* mice were treated with antibiotics, infected with *C. difficile* and administered diphtheria toxin (DT) or PBS (E) 12, 11, 2 and 1 days prior to FMT or (F) 2 and 1 days prior to FMT. Fecal *C. difficile* burden following FMT or PBS administration. (E) DT.FMT (n=4), PBS.FMT (n=2). (F) DT.FMT (n=7), DT.PBS (n=4) mice. Statistical significance was calculated by two-way ANOVA. Data are presented as mean values ± SEM. \* = p < 0.05, \*\*\* = p < 0.001.

# Supplementary Figure 8

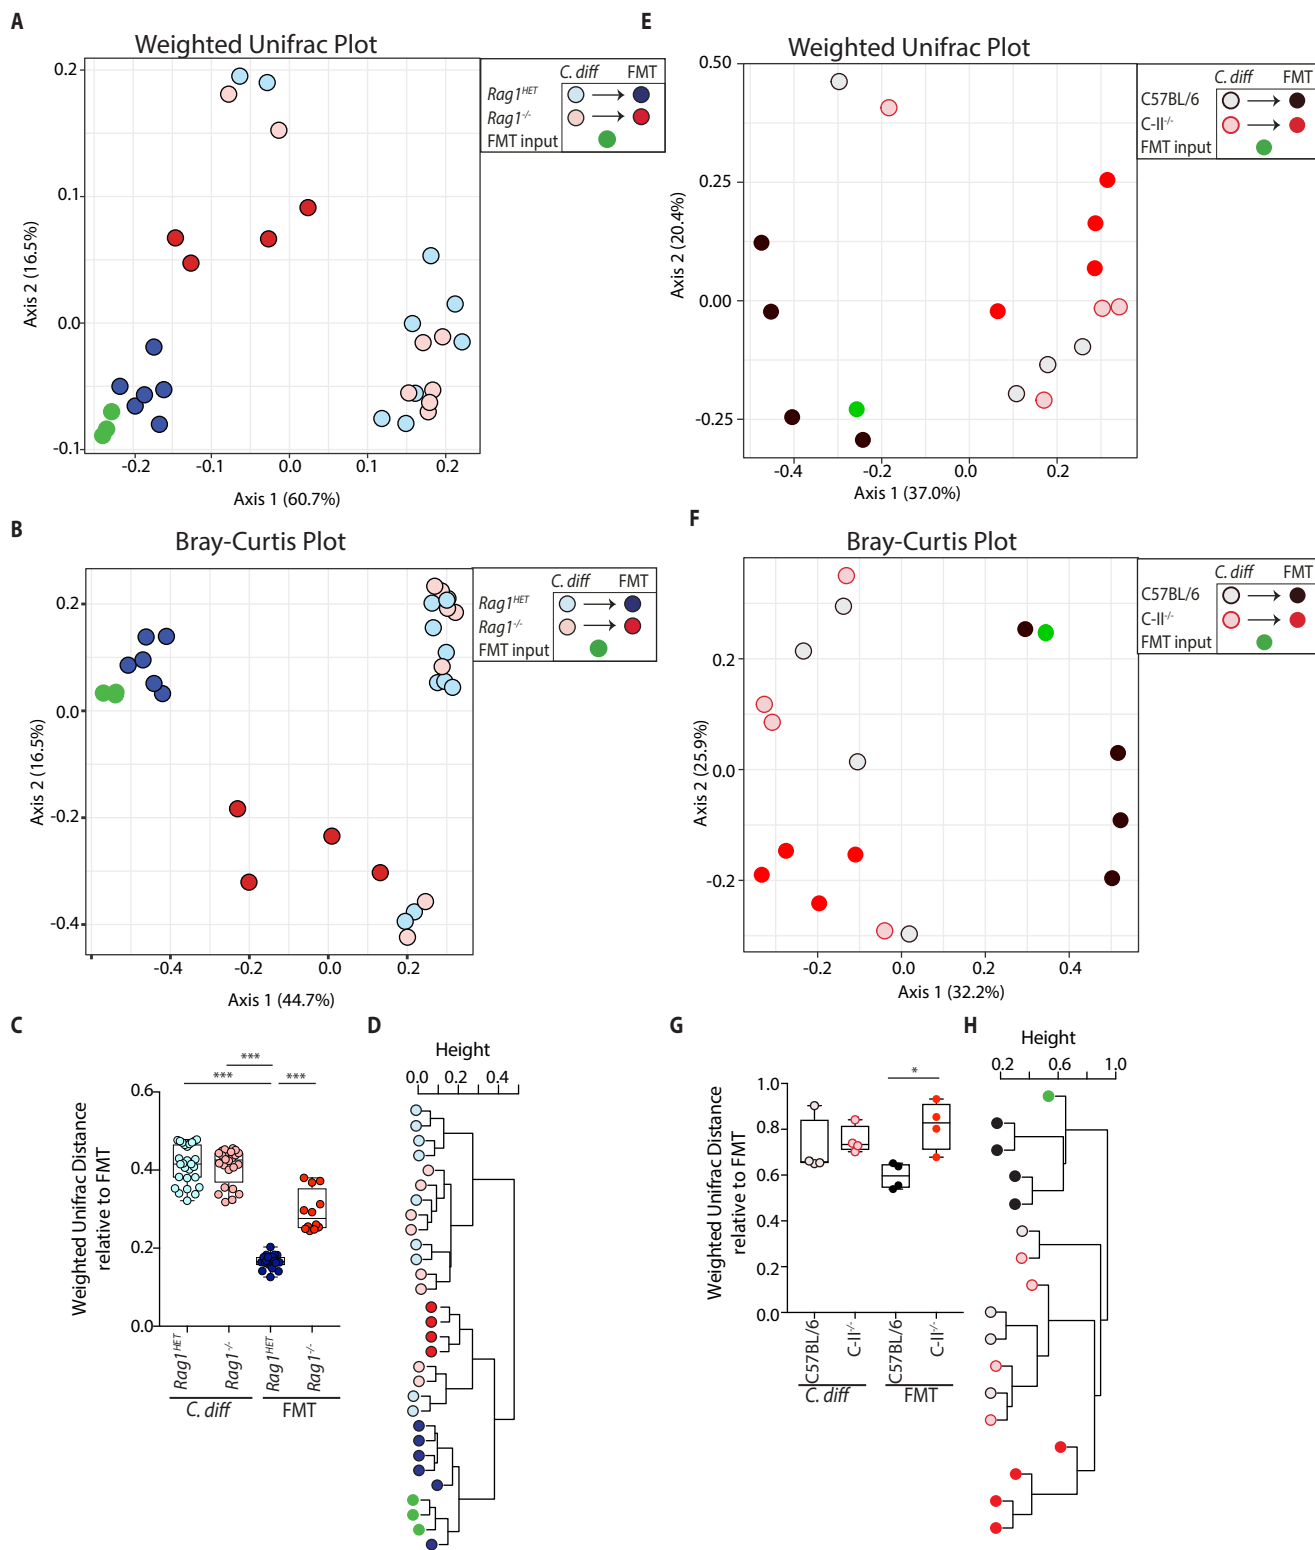

**Supplementary Figure 8. *C. difficile*-infected *Rag1*<sup>-/-</sup> and *C-II*<sup>-/-</sup> mice exhibit impaired FMT engraftment.** (A-D) *C. difficile*-infected *Rag1*<sup>-/-</sup> and *Rag1*<sup>HET</sup> mice or (E-H) C57BL/6 and *C-II*<sup>-/-</sup> mice were administered FMT and microbial composition was analyzed. (A) Weighted UniFrac and (B) Bray-Curtis principal coordinate analysis plot of 16S bacterial rRNA ASVs from the FMT inoculum, fecal pellets of *C. difficile* infected *Rag1*<sup>-/-</sup> and *Rag1*<sup>HET</sup> mice at the time of FMT (day 32 p.i.), and cecal content of *Rag1*<sup>-/-</sup> and *Rag1*<sup>HET</sup> mice at day 21 post-FMT. (C) Microbiota beta diversity dissimilarity comparing *Rag1*<sup>-/-</sup> or *Rag1*<sup>HET</sup> groups to FMT inoculum using weighted UniFrac distance. n=9 *C. diff.* *Rag1*<sup>HET</sup>; n=8 *C. diff.* *Rag1*<sup>-/-</sup>; n=6 FMT *Rag1*<sup>HET</sup>; n=4 FMT *Rag1*<sup>-/-</sup> mice. Statistical significance was calculated by a one-way ANOVA test using Dunnett method for multiple comparison adjustments. \*\*\*p<0.001. Boxes represent median, first and third quartile. Whiskers extend to the highest and lowest data point. (D) Dendrogram representation of intestinal microbial communities of FMT inoculum, *Rag1*<sup>-/-</sup> and *Rag1*<sup>HET</sup> groups using unsupervised hierarchical clustering of weighted UniFrac distances to identify similarities between samples. (E) Weighted UniFrac and (F) Bray-Curtis principal coordinate analysis plot of 16S bacterial rRNA ASVs from the FMT inoculum and fecal pellets of *C. difficile* infected C57BL/6 and *C-II*<sup>-/-</sup> mice at time of FMT and day 15 post-FMT. (G) Microbiota beta diversity dissimilarity comparing C57BL/6 or *C-II*<sup>-/-</sup> groups to FMT inoculum using weighted UniFrac distance. n=4 *C. diff.* C57BL/6, *C. diff.* *C-II*<sup>-/-</sup>, FMT C57BL/6, and FMT *C-II*<sup>-/-</sup> mice. Statistical significance was calculated by a one-way ANOVA test using Dunnett method for multiple comparison adjustments. \*p=0.024. Boxes represent median, first and third quartile. Whiskers extend to the highest and lowest data point. (H) Dendrogram representation of intestinal microbial communities of FMT inoculum, C57BL/6 or *C-II*<sup>-/-</sup> groups using unsupervised hierarchical clustering of weighted UniFrac



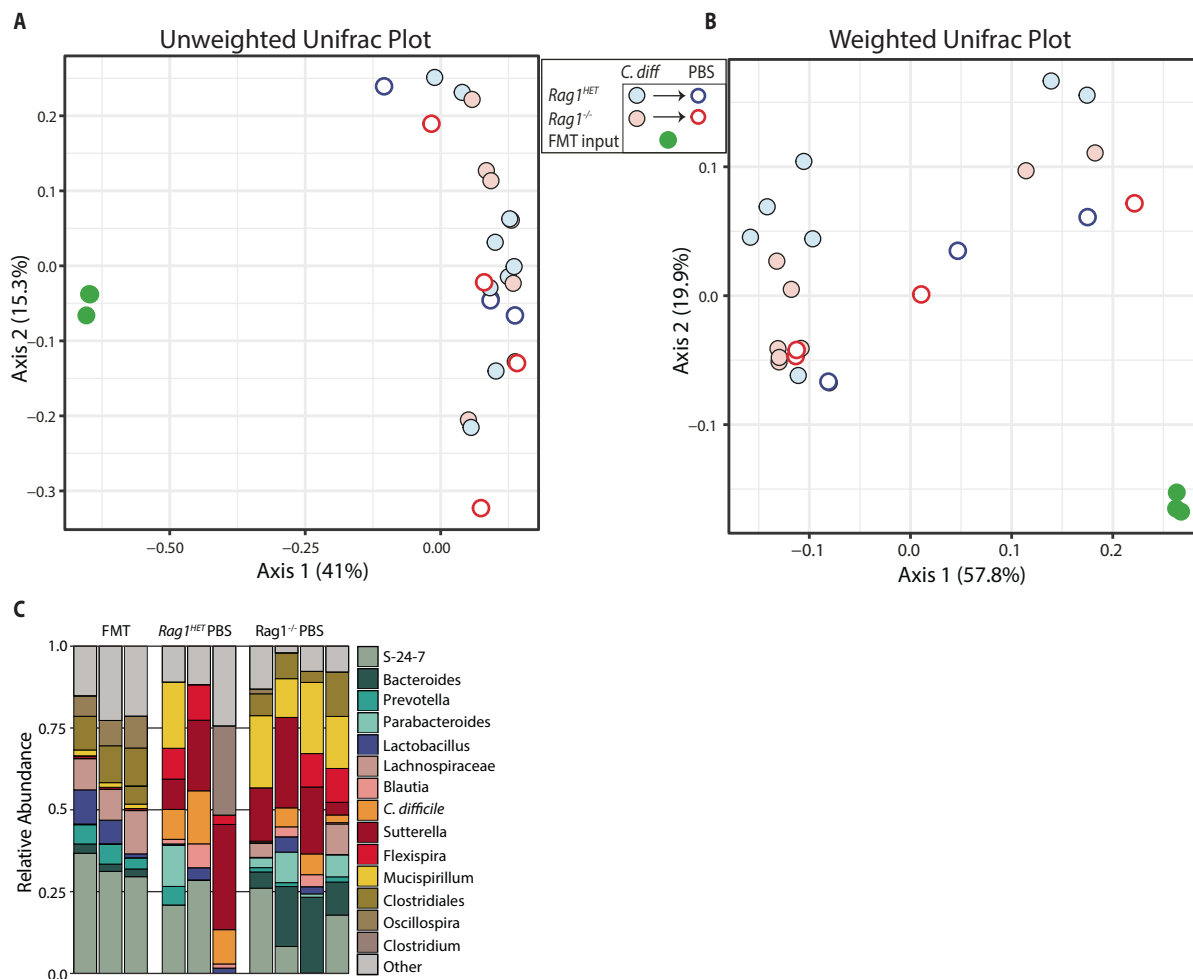

**Supplementary Figure 9. PBS treatment of *C. difficile*-infected  $Rag1^{-/-}$  and  $Rag1^{HET}$  mice does not alter the microbiota.** (A-C) *C. difficile*-infected  $Rag1^{-/-}$  and  $Rag1^{HET}$  mice were administered PBS and microbial composition was analyzed. (A) Unweighted and (B) weighted UniFrac principal coordinate analysis plot of 16S bacterial rRNA ASVs from the FMT inoculum, fecal pellets of *C. difficile* infected  $Rag1^{-/-}$  and  $Rag1^{HET}$  mice at the time of PBS (day 32 p.i.), and cecal content of  $Rag1^{-/-}$  and  $Rag1^{HET}$  mice at day 21 post-PBS treatment. n=9 *C. diff.*  $Rag1^{HET}$ ; n=8 *C. diff.*  $Rag1^{-/-}$ ; n=3 PBS  $Rag1^{HET}$ ; n=4 PBS  $Rag1^{-/-}$  mice. (C) Relative abundance of top 15 bacterial ASVs in the microbiota of *C. difficile*-infected PBS-treated  $Rag1^{-/-}$  and  $Rag1^{HET}$  mice (day 21 post-PBS) compared to FMT inoculum. Bar plot is displayed at the genus level except for orange bars that represent an ASV aligning to *C. difficile*.



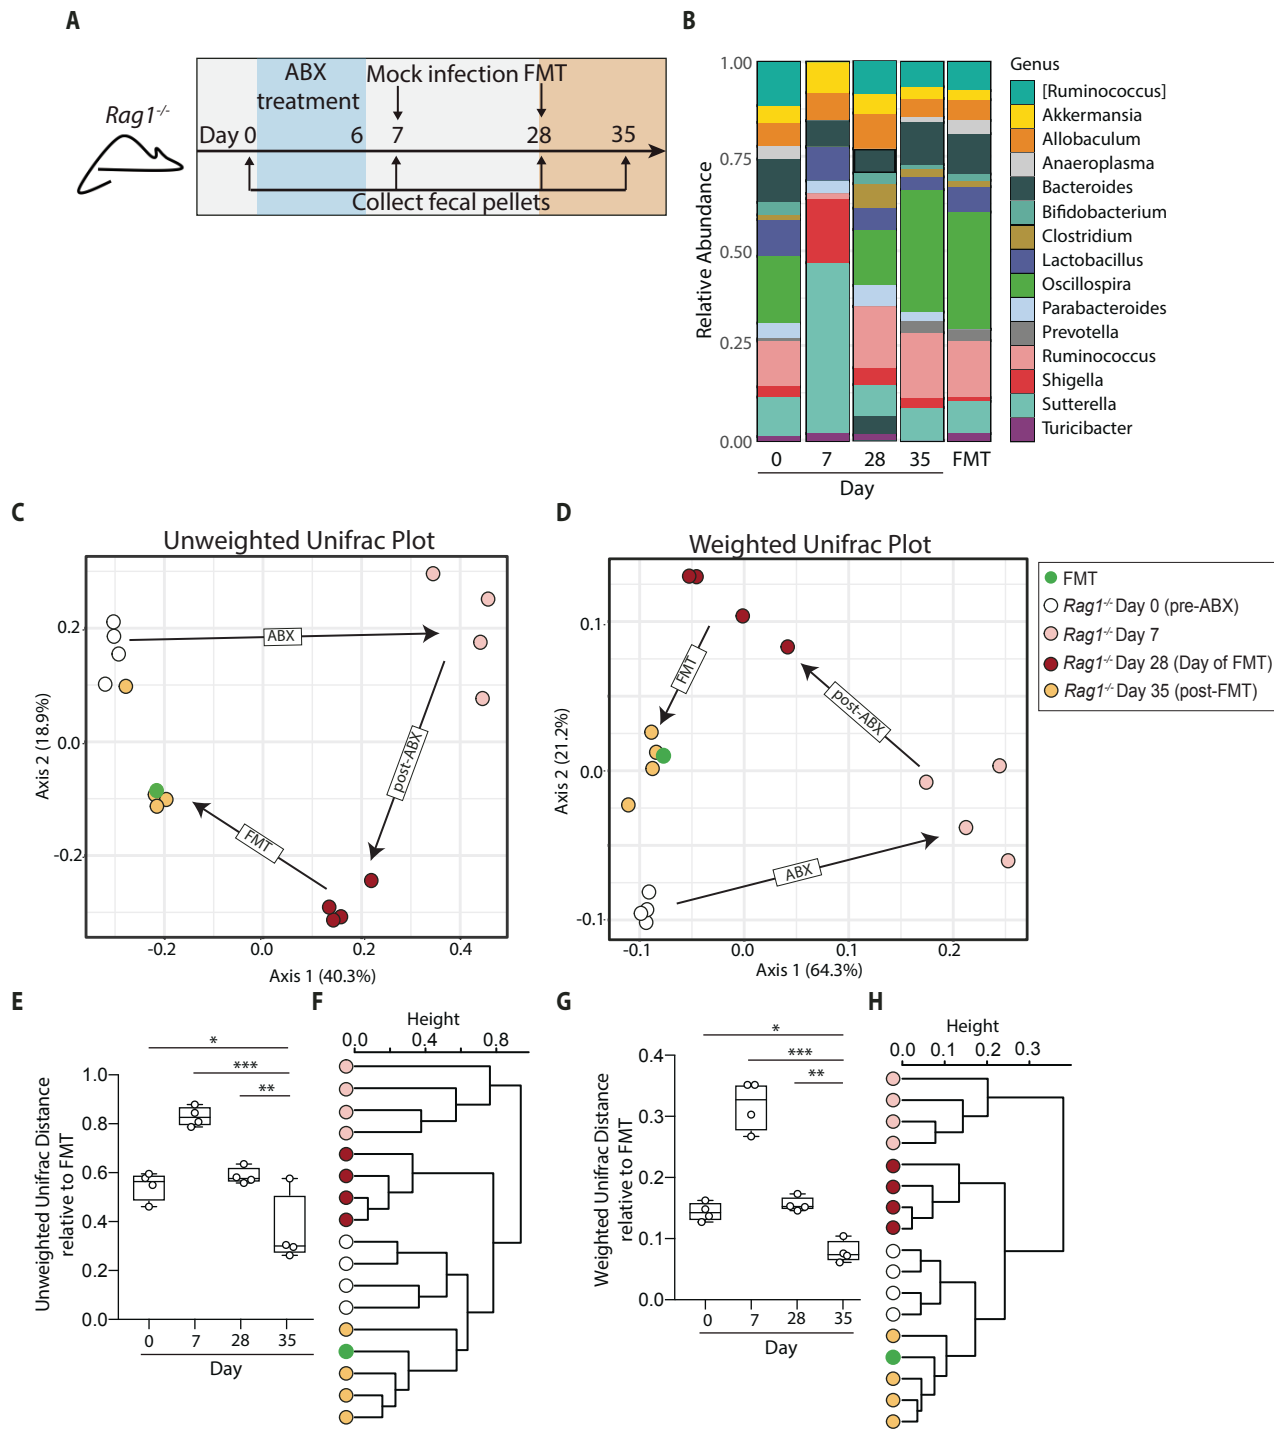

**Supplementary Figure 11. Antibiotic-treated, uninfected mice *Rag1*<sup>-/-</sup> mice do not exhibit impaired FMT engraftment.**

(A) Experimental schematic. *Rag1*<sup>-/-</sup> mice were treated with the same antibiotic regimen used to predispose mice to *C. difficile* infection but were left uninfected and rested for 22 days following cessation of antibiotics. Mice were administered a FMT at day 28 post the start of antibiotics. Fecal pellets were collected prior to antibiotics (day 0), immediately following antibiotics (day 7), the day of FMT (day 28), and 7 days following FMT (day 35) for 16S rRNA bacterial gene profiling. (B) Relative abundance of top 15 bacterial ASVs in the microbiota of antibiotic-treated, uninfected *Rag1*<sup>-/-</sup> mice. (C) Unweighted and (D) weighted UniFrac principal coordinate analysis plot of 16S bacterial rRNA ASVs over the course of the experiment. (E) Microbiota beta diversity dissimilarity comparing *Rag1*<sup>-/-</sup> groups to FMT inoculum using unweighted UniFrac distance.  $n=4$  *Rag1*<sup>-/-</sup> mice per timepoint. Statistical significance was calculated by one-way ANOVA test using Dunnett method for multiple comparison adjustments. \* $p=0.014$ , \*\* $p=0.0031$ , \*\*\* $p<0.0001$ . Boxes represent median, first and third quartile. Whiskers extend to the highest and lowest data point. (F) Dendrogram representation of intestinal microbial communities of FMT inoculum and *Rag1*<sup>-/-</sup> groups using unsupervised hierarchical clustering of unweighted UniFrac distances to identify similarities between samples. (G) Microbiota beta diversity dissimilarity comparing *Rag1*<sup>-/-</sup> groups to FMT inoculum using weighted UniFrac distance.  $n=4$  *Rag1*<sup>-/-</sup> mice per timepoint. Statistical significance was calculated by one-way ANOVA test using Dunnett method for multiple comparison adjustments. \* $p=0.019$ , \*\* $p=0.0059$ , \*\*\* $p<0.0001$ . Boxes represent median, first and third quartile. Whiskers extend to the highest and lowest data point. (H) Dendrogram representation of intestinal microbial communities of FMT inoculum and *Rag1*<sup>-/-</sup> groups using unsupervised hierarchical clustering of weighted UniFrac distances to identify similarities between samples.

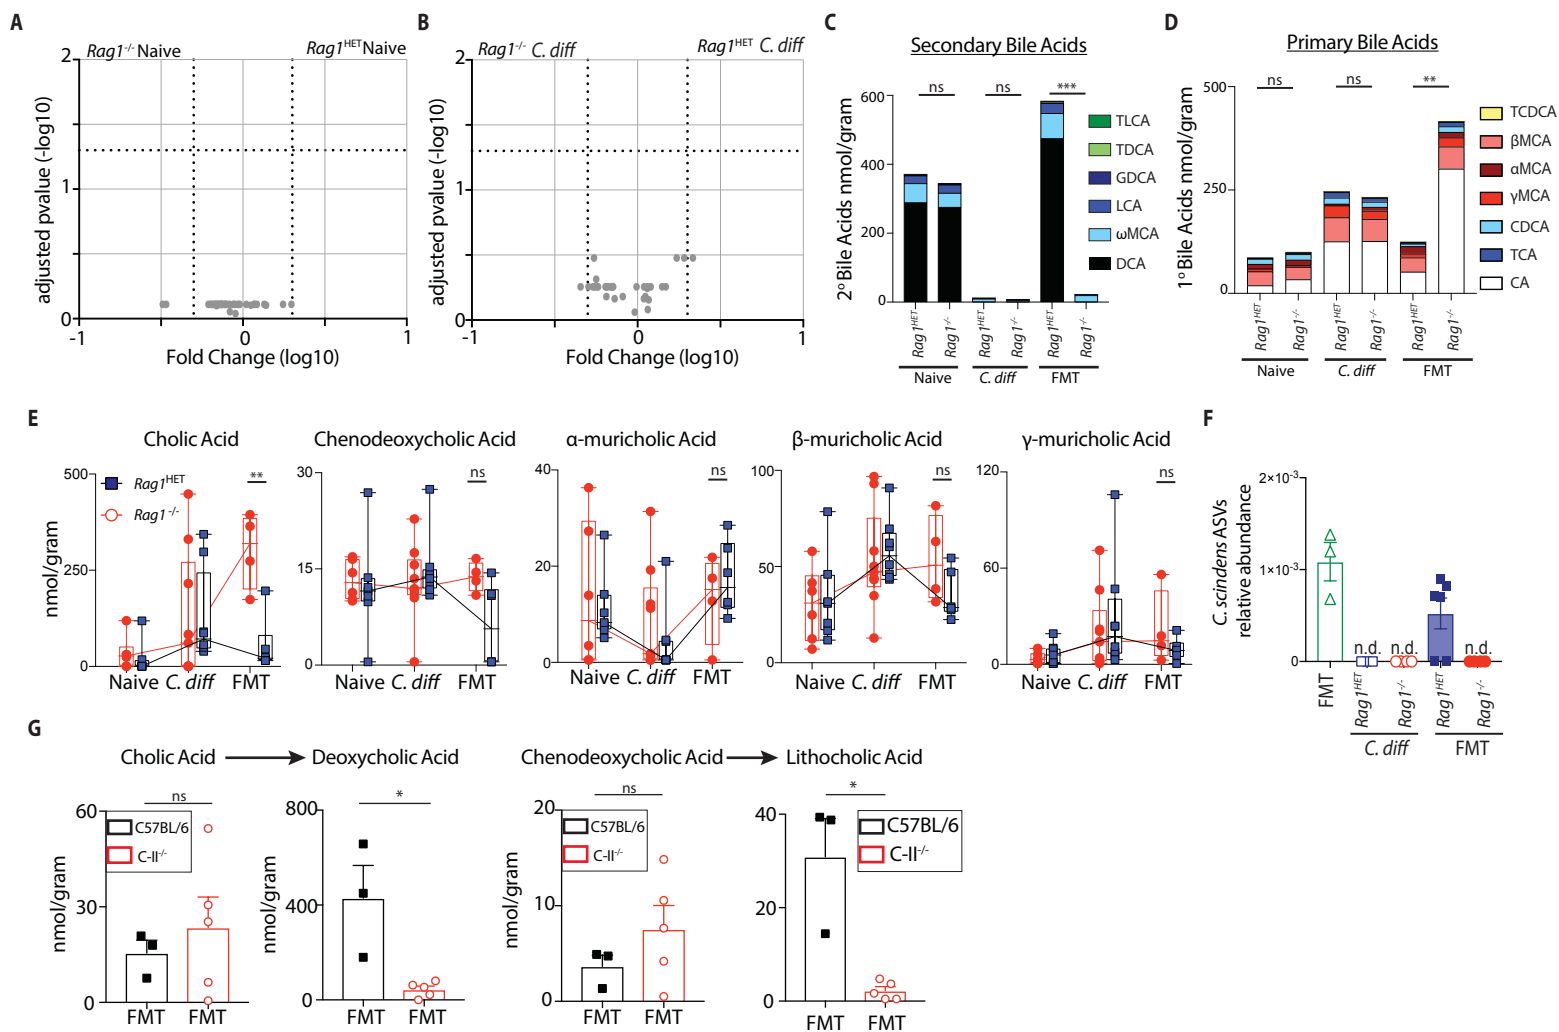

**Supplementary Figure 12. FMT non-responsive mice fail to restore secondary bile acid levels.** *C. difficile*-infected *Rag1<sup>-/-</sup>* and *Rag1<sup>HET</sup>* mice were administered FMT or PBS, sacrificed 21 days later along with naive mice and amino acid, short chain fatty acid (SCFA), 1o and 2o bile acid pools were analyzed in cecal content. Volcano plot of metabolites in the cecum of (A) naive and (B) *C. difficile*-infected *Rag1<sup>-/-</sup>* and *Rag1<sup>HET</sup>* mice. Significance threshold criteria set at a two-fold change in concentration and adjusted p-value of 0.05 using an unpaired t-test and adjusted for false discovery rate. Cumulative concentration of (C) 2o and (D) 1o bile acids. Statistical significance was calculated by a two-sided unpaired t-test. \*\* $p=0.0027$ , \*\*\* $p<0.0001$ . (TCDCA- taurochenodeoxycholic acid, αMCA- alphamuricholic acid, βMCA- betamuricholic acid, γMCA- gammamuricholic acid, CDCA- chenodeoxycholic acid, TCA- taurocholic acid, CA- cholic acid, TLCA- tauroolithocholic acid, TDCA- taurodeoxycholic acid, GDCA- glycodeoxycholic acid, LCA- lithocholic acid, ωMCA- omegamuricholic acid, DCA- deoxycholic acid). (E) Concentration of individual 1o bile acids.  $n=5$  naive *Rag1<sup>-/-</sup>* and *Rag1<sup>HET</sup>* mice;  $n=6$  *C. difficile*-infected *Rag1<sup>-/-</sup>* and *Rag1<sup>HET</sup>* mice;  $n=4$  *C. difficile*-infected FMT-treated *Rag1<sup>-/-</sup>*;  $n=6$  *C. difficile*-infected FMT-treated *Rag1<sup>HET</sup>* mice examined over two independent experiments. Statistical significance was calculated by a one-way ANOVA using Dunnett method for multiple comparison adjustments. DCA \*\* $p=0.0052$ . Boxes represent median, first and third quartile. Whiskers extend to the highest and lowest data point. (F) Frequency of ASVs that share > 98.5% sequence homology to *C. scindens* as determined by 16S rRNA sequence reads from FMT inoculum, or cecal content of *C. difficile*-infected or FMT-treated *Rag1<sup>-/-</sup>* and *Rag1<sup>HET</sup>* mice.  $n=3$  FMT;  $n=3$  *C. diff* *Rag1<sup>HET</sup>*;  $n=4$  *C. diff* *Rag1<sup>-/-</sup>*;  $n=4$  FMT *Rag1<sup>-/-</sup>*;  $n=6$  FMT *Rag1<sup>HET</sup>* mice. n.d. – not detected. Data are presented as mean values  $\pm$  SEM. (G) Concentration of 1o bile acids (cholic acid and chenodeoxycholic acid) and 2o bile acids (deoxycholic acid and lithocholic acid) in the cecal content of C57BL/6 ( $n=3$ ) and *C-II<sup>-/-</sup>* ( $n=5$ ) mice at day 28 post-FMT. Data is representative of 2 independent experiments. Statistical significance was calculated by a two-sided unpaired Mann-Whitney test. DCA, \* $p=0.036$ ; LCA, \* $p=0.036$ . Data are presented as mean values  $\pm$  SEM. b.d. – below detection.

## Supplementary Figure 13

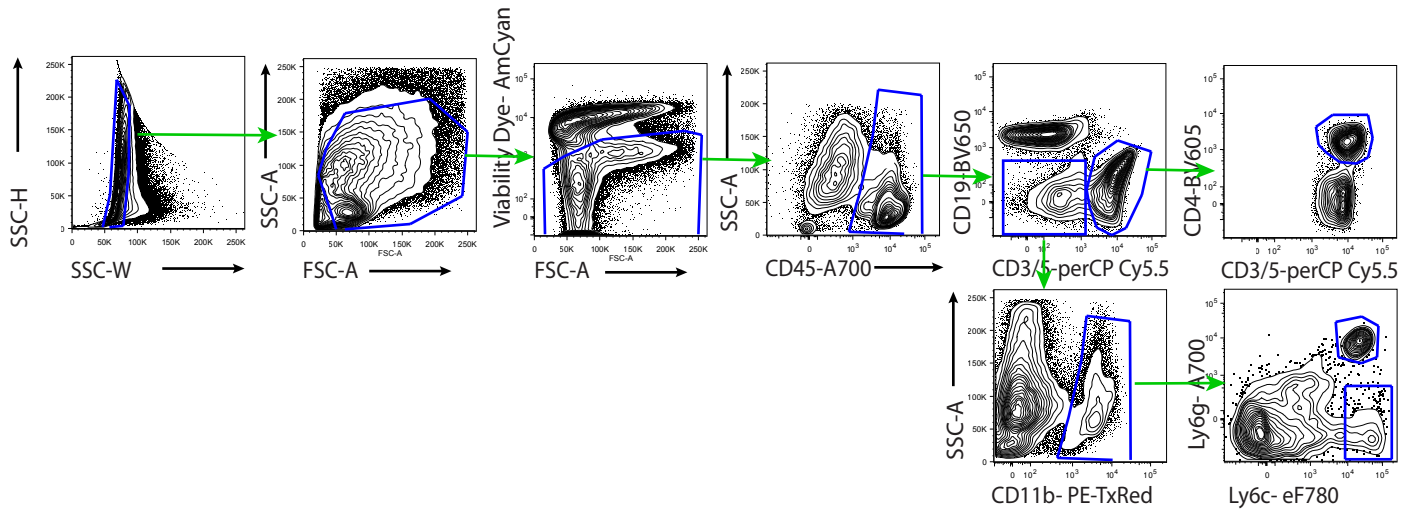

**Supplementary Figure 13. Flow Cytometry Gating Strategy.** Gating strategy used to identify CD4 T cells, inflammatory monocytes and neutrophils in the large intestine lamina propria. Gating strategy related to data in Figure 3 & 4.

## SupplementaryTable 1

## PERMANOVA - Unweighted UniFrac

| Pair Comparison                                                      | $R^2$  | p-value | FDR   | Significance |
|----------------------------------------------------------------------|--------|---------|-------|--------------|
| <i>Rag1</i> <sup>HET</sup> vs <i>Rag1</i> <sup>-/-</sup> pre-ABX     | 0.0814 | 0.016   | 0.048 | *            |
| <i>Rag1</i> <sup>HET</sup> vs <i>Rag1</i> <sup>-/-</sup> Day 0 p.i.  | 0.0524 | 0.488   | 0.488 | ns           |
| <i>Rag1</i> <sup>HET</sup> vs <i>Rag1</i> <sup>-/-</sup> Day 36 p.i. | 0.1088 | 0.078   | 0.117 | ns           |

## PERMANOVA - Weighted UniFrac

| Pair Comparison                                                      | $R^2$  | p-value | FDR   | Significance |
|----------------------------------------------------------------------|--------|---------|-------|--------------|
| <i>Rag1</i> <sup>HET</sup> vs <i>Rag1</i> <sup>-/-</sup> pre-ABX     | 0.1135 | 0.025   | 0.062 | ns           |
| <i>Rag1</i> <sup>HET</sup> vs <i>Rag1</i> <sup>-/-</sup> Day 0 p.i.  | 0.0332 | 0.675   | 0.675 | ns           |
| <i>Rag1</i> <sup>HET</sup> vs <i>Rag1</i> <sup>-/-</sup> Day 36 p.i. | 0.1441 | 0.041   | 0.062 | ns           |

**Supplementary Table 1.** PERMANOVA analysis of unweighted and weighted UniFrac distances between the intestinal microbial communities of *Rag1*<sup>HET</sup> and *Rag1*<sup>-/-</sup> mice before antibiotic treatment, at day 0 of infection and at day 36 post *C. difficile* infection. The Benjamini & Hoch-berg method was used to adjust for multiple comparisons. Statistical tests performed on data displayed in Figure 2 and Supplemental Figure 3

## PERMANOVA - Unweighted UniFrac

| Pair Comparison                                                        | $R^2$  | p-value | FDR    | Significance |
|------------------------------------------------------------------------|--------|---------|--------|--------------|
| <i>Rag1<sup>HET</sup></i> vs <i>Rag1<sup>-/-</sup></i> Day 32 p.i.     | 0.0572 | 0.511   | 0.5348 | ns           |
| <i>Rag1<sup>HET</sup></i> vs <i>Rag1<sup>-/-</sup></i> Day 32 ABX only | 0.1274 | 0.216   | 0.2430 | ns           |
| <i>Rag1<sup>HET</sup></i> vs <i>Rag1<sup>-/-</sup></i> No ABX          | 0.2129 | 0.400   | 0.4286 | ns           |

## PERMANOVA - Weighted UniFrac

| Pair Comparison                                                        | $R^2$  | p-value | FDR    | Significance |
|------------------------------------------------------------------------|--------|---------|--------|--------------|
| <i>Rag1<sup>HET</sup></i> vs <i>Rag1<sup>-/-</sup></i> Day 32 p.i.     | 0.1090 | 0.100   | 0.1184 | ns           |
| <i>Rag1<sup>HET</sup></i> vs <i>Rag1<sup>-/-</sup></i> Day 32 ABX only | 0.1307 | 0.158   | 0.1777 | ns           |
| <i>Rag1<sup>HET</sup></i> vs <i>Rag1<sup>-/-</sup></i> No ABX          | 0.3256 | 0.300   | 0.3293 | ns           |

**Supplementary Table 2.** PERMANOVA analysis of unweighted and weighted UniFrac distances between the intestinal microbial communities of *Rag1<sup>HET</sup>* and *Rag1<sup>-/-</sup>* mice at day 32 post *C. difficile* infection, day 32 post antibiotic only treatment and day 32 no antibiotic treatment. The Benjamini & Hochberg method was used to adjust for multiple comparisons. Statistical tests performed on data displayed in Supplemental Figure 4.

## Supplementary Table 3

## PERMANOVA - Unweighted UniFrac

| Pair Comparison                                                    | $R^2$  | p-value | FDR   | Significance |
|--------------------------------------------------------------------|--------|---------|-------|--------------|
| <i>Rag1<sup>HET</sup></i> FMT vs <i>Rag1<sup>-/-</sup></i> FMT     | 0.4804 | 0.009   | 0.025 | *            |
| <i>Rag1<sup>HET</sup></i> FMT vs <i>Rag1<sup>HET</sup></i> C. diff | 0.5856 | 0.001   | 0.008 | **           |
| <i>Rag1<sup>HET</sup></i> FMT vs <i>Rag1<sup>HET</sup></i> PBS     | 0.5557 | 0.009   | 0.025 | *            |
| <i>Rag1<sup>-/-</sup></i> FMT vs <i>Rag1<sup>-/-</sup></i> C. diff | 0.3649 | 0.001   | 0.008 | **           |
| <i>Rag1<sup>-/-</sup></i> FMT vs <i>Rag1<sup>-/-</sup></i> PBS     | 0.3489 | 0.053   | 0.066 |              |
| <i>Rag1<sup>HET</sup></i> PBS vs <i>Rag1<sup>HET</sup></i> C. diff | 0.0963 | 0.428   | 0.446 |              |
| <i>Rag1<sup>-/-</sup></i> PBS vs <i>Rag1<sup>-/-</sup></i> C. diff | 0.1795 | 0.037   | 0.053 |              |
| <i>Rag1<sup>HET</sup></i> PBS vs <i>Rag1<sup>-/-</sup></i> PBS     | 0.1348 | 0.489   | 0.489 |              |

## PERMANOVA - Weighted UniFrac

| Pair Comparison                                                    | $R^2$  | p-value | FDR   | Significance |
|--------------------------------------------------------------------|--------|---------|-------|--------------|
| <i>Rag1<sup>HET</sup></i> FMT vs <i>Rag1<sup>-/-</sup></i> FMT     | 0.5659 | 0.007   | 0.020 | *            |
| <i>Rag1<sup>HET</sup></i> FMT vs <i>Rag1<sup>HET</sup></i> C. diff | 0.5753 | 0.001   | 0.009 | **           |
| <i>Rag1<sup>HET</sup></i> FMT vs <i>Rag1<sup>HET</sup></i> PBS     | 0.5461 | 0.009   | 0.025 | *            |
| <i>Rag1<sup>-/-</sup></i> FMT vs <i>Rag1<sup>-/-</sup></i> C. diff | 0.3879 | 0.006   | 0.020 | *            |
| <i>Rag1<sup>-/-</sup></i> FMT vs <i>Rag1<sup>-/-</sup></i> PBS     | 0.3066 | 0.143   | 0.168 |              |
| <i>Rag1<sup>HET</sup></i> PBS vs <i>Rag1<sup>HET</sup></i> C. diff | 0.1347 | 0.201   | 0.220 |              |
| <i>Rag1<sup>-/-</sup></i> PBS vs <i>Rag1<sup>-/-</sup></i> C. diff | 0.0589 | 0.514   | 0.526 |              |
| <i>Rag1<sup>HET</sup></i> PBS vs <i>Rag1<sup>-/-</sup></i> PBS     | 0.0648 | 0.705   | 0.800 |              |

**Supplementary Table 3.** PERMANOVA analysis of unweighted and weighted UniFrac distances between the intestinal microbial communities of *Rag1<sup>HET</sup>* and *Rag1<sup>-/-</sup>* mice at the time of FMT and at day 21 post FMT or PBS treatment. The Benjamini & Hochberg method was used to adjust for multiple comparisons. Statistical tests performed on data displayed in Figure 5 and Supplemental Figure 8, 9.
